# Supplementary material
Source: PubMed Central journal article supplement (PMC7094235)
Supplement: mmc1.pdf [file mmc1.pdf]

### Supplementary Material:

Table I: Summarizes details on the 13 coronaviruses studied here. In this work, we chose the papain-like protease domains (20 in all) of those coronaviruses analogous to the SARS-CoV PLpro minimal core domain (1540-1854) following the basic strategy of Barretto and co-workers (1). Seven of these nine coronaviruses, namely MHV strain JHM, bovine CoV (BCoV), HCoV-HKU1, TGEV, HCoV-NL63, HCoV-229E and HCoV-OC43 encode two papain like protease domains, termed PL1 and PL2. The SARS-CoV, aIBV and the four Bat coronaviruses, namely Bat-SARS-CoV (NCBI Accession: AAZ67050) BtCoV/273/2005 (ABG47059), BtCoV/133/2005 (Q0Q4F3), and BtCoV-HKU9 (A3EXG5) encode only one papain-like protease domain termed PLpro (2, 3)

| Full name of coronaviruses<br>(Primary species infected)                    | Abbreviations | PLPs       | Domain of PLP sequences analyzed | Serological groups |
|-----------------------------------------------------------------------------|---------------|------------|----------------------------------|--------------------|
| Transmissible Gastroenteritis virus <sup>4</sup> (Pigs)                     | TGEV-CoV      | PL1<br>PL2 | 992-1248<br>1479-1781            | G1a                |
| Human Coronavirus NL or New Haven Coronavirus <sup>5,6</sup> (Human)        | HCoV-NL63     | PL1<br>PL2 | 952-1250<br>1578-1876            | G1b                |
| Human Coronavirus 229E <sup>7,8</sup> (Human)                               | HCoV-229E     | PL1<br>PL2 | 949-1245<br>1599-1905            | G1b                |
| Bovine Coronavirus <sup>9</sup> (Cows/cattle)                               | BCoV          | PL1<br>PL2 | 965-1250<br>1562-1870            | G2a                |
| Human Coronavirus Hong Kong University <sup>10,11</sup> (Human)             | HCoV-HKU1     | PL1<br>PL2 | 1028-1329<br>1648-1955           | G2a                |
| Murine Hepatitis virus strain JHM <sup>12-14</sup> (Mouse)                  | MHV-JHM-CoV   | PL1<br>PL2 | 1013-1309<br>1606-1915           | G2a                |
| Human Coronavirus OC43 <sup>15</sup> (Human)                                | HCoV-OC43     | PL1<br>PL2 | 965-1250<br>1562-1870            | G2a                |
| Severe Acute Respiratory Syndrome Coronavirus (CoV) <sup>2,16</sup> (Human) | HCoV-SARS     | PLP        | 1540-1854                        | G2b                |
| Bat-SARS-Coronavirus <sup>22,23</sup> (Bat)                                 | Bt-SARS-CoV   | PLP        | 1539-1854                        | G2b                |
| Bat Coronavirus 273 <sup>17</sup> (Bat)                                     | BtCoV-273     | PLP        | 1537-1855                        | G2b                |
| Bat Coronavirus 133 <sup>17</sup> (Bat)                                     | BtCoV-133     | PLP        | 1533-1855                        | G2c                |
| Bat coronavirus HKU9 <sup>18</sup> (Bat)                                    | BtCoV-HKU9    | PLP        | 1426-1737                        | G2d                |
| Avian infectious Bronchitis virus <sup>24</sup> (Birds)                     | a-IBV         | PLP        | 1174-1536                        | G3                 |

The PLP1s of the coronaviruses were first aligned with the SARS-CoV-PLpro amino acid sequence using ClustalW [19]. The result was manually checked and edited to make sure that the key residues identified from the structure of the 315aa region of the minimal core domain (actual amino acid sequence numbers) of SARS-CoV-PLpro, namely W107 (W1646), N110 (N1649), C112 (C1651), Y113 (Y1652), L163 (L1702), G164 (G1703), D165 (D1704), E168 (E1707), Y265 (Y1804), G267 (G1806), G272 (G1811), H273 (H1812), Y274 (Y1813) and D287 (D1826), were aligned correctly with the other seven coronaviral PLP1s. This multiple sequence alignment was named Profile1. Next, the PLP2s of the coronaviruses, along with aIBV and the BtCoV-PLPs were aligned to the SARS-CoV-PLpro sequence (with special attention given to the 14 residues noted above) to obtain a second alignment termed Profile2. ClustalX [19] was then used to perform a profile alignment between Profile1 and Profile2 to conserve the alignments within the individual profiles and yet align them with each other. Profile alignment works much better among the PLpro amino acid sequences since the low sequence identity barely preserves the alignment of the important residues among the family, especially among the PLP1s and PLP2s. To our knowledge, this type of profile aligning approach has not been used in any prior work. The resulting multiple sequence alignment shows that even though the overall sequence identity in the coronaviral protease domain is very low (highest being ~30%), the amino acids likely to participate in the catalytic core are highly conserved.

Table II: The multiple sequence alignment of coronavirus papain-like protease (PLP) core domains shows the active site conserved residues highlighted in yellow starting with W107 of SARS-CoV-PLpro that stabilizes the oxyanion hole. The catalytic cysteine, histidine and aspartic acid are completely conserved among all PLPs. The residues highlighted in yellow are the 14 residues that are studied in detail among all the coronaviruses for cluster generation and classification studies. Besides these, the four Zn-chelating cysteines intermittently substituted by a histidine in 229E-PLP2, NL63-PLP2 and TGEV-PLP2 are highlighted in magenta. Additional residues such as N111 and Q122 that are also totally conserved among all the PLPs, but are not present in the active site; the residues corresponding to P249 or T302 that participates in the formation of the hydrophobic crevice that is balanced by leucine in the S4 substrate position of LXGG are highlighted in green. The arrows point to the key SARS-CoV-PLpro residues (all residue numbering is referenced to the 316-amino-acid catalytic core domain of PLpro, Ratia et al. (21)

|        |         |                                                              |
|--------|---------|--------------------------------------------------------------|
| SARS   | PLP1540 | -----MEVKTIKVFVTTVDNTNLHTQLVDMSTYGGQFGPTYLDG-ADVTIKKPHVNHGK  |
| BtSARS | PLP1539 | -----EVKTIKVFVTTVDNTNLHTQLVDMSTYGGQLGPTYLEG-ADVTIKKPHVNHGK   |
| Bt273  | PLP1537 | -----EVKTIKVFVTTVDNTNLHTQLVDMSTYGGHFGPTYLDG-ADVTIKKPHVNHGK   |
| Bt133  | PLP1533 | -----NIEVLVITDGVNFRVTIINDATFRKQLGATFYKG-VDISDALPTVKMGGE      |
| BtHKU9 | PLP1426 | ETKLCAPEPLIKVLTVDGINYSTVLVSTAQSYRAQIGTVFCDG-HDWSNKNPMPDDEGT  |
| MHVJ   | P2 1606 | -----LANKVDVLCVTDGVNFRSCCVAEGEVFGKTLGVSFCDG-INVTKVRCSAIYK GK |
| HKU1   | P2 1648 | -----LAKKIDVLLTVDGVNFKSISLTVGEVFGKILGNVFCDG-IDVTKLKCSDFYADK  |
| BCoV   | P2 1562 | -----LDKVDILLTVDGVNFTNRFVVPVGSFSGKSLGNVFCDG-VNVTKHKCDINYGK   |
| OC43   | P2 1562 | -----LDKVDILLTVDGVNFTNRFVVPVGSFSGKSLGNVFCDG-VNVTKHKCDINYGK   |
| 229E   | P2 1599 | -----EAKVITIKVTEDEGVNVHDVTVTTDKSFEQQVG-VIADKDKDLGSAVPSDLNTSE |
| NL63   | P2 1578 | -----KNDNVVLKITEDGINVKDVVVESSKSLGKQLG-VVSDGVDSFEGVLP--INTDT  |
| TGEV   | P2 1479 | QTIENFFSCSIPVNVTEDEVNHERVSVSFDKTYGEQLKGTVVIKDKDVTNQLPSAFDVGQ |
| aIBV   | PLP1174 | -----TCKQKTIYLTEDGVKYRSIVLKPQDGLG-QFGQVYA-KNKIVFTAD-DVEDKEI  |
| 229E   | P1 949  | ----FCKTIQSALSVVSCYHNLPTYYIYDEEGNDLSLPMISEWPLSVQG----AQQEA   |
| NL63   | P1 952  | -----EVLTSAMNVIQHIKLPQFYIYDEEGGYDVSKPVMISQWPISNDQCSLVEAST    |
| BCoV   | P1 965  | -ED--DDFLEESGVEEDDVEGEETDLTVTSAGEPCVASEQEESEILEDTLDDGPCVETS  |
| OC43   | P1 965  | -ED--DDFLEESDVEEDDVEGEETDLTVTSAGQPCVASEQEESEVLEDTLDDGPCVETS  |
| HKU1   | P1 1028 | -EDVVTGDNDDEDVVTGDNDDEDVVTGDNDDEDVVTGDNDDEDVVTGDNDQIVVTGDDV  |
| MHVJ   | P1 1013 | ---PIASAEETEVEGEADREG-IAEVKATVCADALDACPDQVEAFDIEKVESLSELQT   |
| TGEV   | P1 992  | ----EVSASSEEEEEVESVEEDPENEIVEASEGAEGTS----SQEEVETVEVADITSTEE |

(W107) W1646 C1651 (C112)

|        |         |                                                                |   |       |
|--------|---------|----------------------------------------------------------------|---|-------|
| SARS   | PLP1594 | TFFVLPSSDRTLSEAFEYHYHTL-DESFLGRYMSALNHTKKWKFPQVGGGLTSIKWADNNCY | ↓ | Y1652 |
| BtSARS | PLP1592 | TFFVLPSSDRTLSEAFEYHYHTL-DESFLGRYMSALNHTKKWKFPQVGGGLTSIKWADNNCY |   |       |
| Bt273  | PLP1590 | TFFVLPSSDRTLSEAFEYHYHTL-DESFLGRYMSALNHTKKWKFPQVGGGLTSIKWADNNCY |   |       |
| Bt133  | PLP1580 | SLFVADNLSESEEVVLKEYYGTSDVTFLQRYYSLQPLVQQWKFVVDHGVKSLKLSNYCY    |   |       |
| BtHKU9 | PLP1485 | HLYKQDNFSSAEVTAIREYYGVDDSNIIARAMSIRKTVQTPWYTVVDGRVLLAQRDSNCY   |   |       |
| MHVJ   | P2 1660 | VFFQYSDLSEADLAAVKDAFGF-DEPQLLQYYSM LGMC-KWPVVVCGNYFAPKQSNNNCY  |   |       |
| HKU1   | P2 1701 | ILYQYENLSLADISAVQSSFGF-DQQQLLAYYNFLTVC-KWSVVVNGPFFSFEQSHNNCY   |   |       |
| BCoV   | P2 1614 | VFFQFDNLSSSEDLKAVRSSFNFDQKELLAYYNMLVNCCKWQVVFNGKYFTFKQANNCF    |   |       |
| OC43   | P2 1614 | VFFQFDNLSSSEDLKAVRSSFNFDQKELLAYYNMLVNCCKWQVVFNGKYFTFKQANNCF    |   |       |
| 229E   | P2 1652 | LLTKAIDVDWVEFYGFKDAVTF-ATVDHSAFA-----YESAVVNGIRVLKTSDDNNCW     |   |       |
| NL63   | P2 1629 | VLSVAPEVDWVAFYGFKEAALF-ASLDVKPYG-----YPNDFVGGFRVLGTDDNNCW      |   |       |
| TGEV   | P2 1539 | KVIKAIDIDWQAHYGFRAAAAF-SASSHDAYK-----FEVVTTHSNFIVHKQDNNCW      |   |       |
| aIBV   | PLP1225 | LYVPTTDKSILEYGLDAQKYVIYLTQTLAQK-----WNVQYRDNLFLEWRDGNCW        |   |       |
| 229E   | P1 1001 | TLPDIAEDVVDQVEEVNSIFDIETVDVKHDVS---PFEMPFE--ELNGLKILKQLDNNCW   |   |       |
| NL63   | P1 1006 | DFHQLECIVDSDSREEVVDIEQPFEEVEHVLSI--KQPFSSFRDELGVRVLDQSDNNCW    |   |       |
| BCoV   | P1 1022 | DSQVEEDVEMSDFADESIVQDYENVCFEFYT---TEPEFV--KVLGLYVPKATRNNCW     |   |       |
| OC43   | P1 1022 | DSQVEEDVEMSDFDVLESIVQDYENVCFEFYT---TEPEFV--KVLGLYVPKATRNNCW    |   |       |
| HKU1   | P1 1087 | DD-IESIYDFDITYKALLVFNVDYNDALFVSYGSSVETETYF---KVNLWSPTIHTNCW    |   |       |
| MHVJ   | P1 1069 | ELNAPADKTYEDVLAFDAIYSETLSAFYAVPS---DETHF---KVCGFYSPIAERTNCW    |   |       |
| TGEV   | P1 1043 | DVDIVEVSAKDDPWAADVQEAQFNPSLPP-----FKTTNLNGKILKQGDNNCW          |   |       |

: \*\*: :

Q1661 (Q122)

L1702 (L163)

|        |         |                                                                |   |              |
|--------|---------|----------------------------------------------------------------|---|--------------|
| SARS   | PLP1653 | LSSVLLALQQL-EVKFN----APALQEAYYRARAGDAANFCALILAYS--NKTVGELGDVDR | ↓ | D1704 (D165) |
| BtSARS | PLP1651 | LSSVLLALQQL-EVKFN----APALQEAYYRARAGDAANFCALILAYS--NKTVGELGDVDR |   |              |
| Bt273  | PLP1649 | LSSVLLALQQL-EVKFN----APALQEAYYRARAGDAANFCALILAYS--NKTVGELGDVDR |   |              |
| Bt133  | PLP1640 | INATIMMIIMLHDIKVVVP--A--LQNALRYKGGDPYDFLALIMAYG--DCTFDNPDD--   |   |              |
| BtHKU9 | PLP1545 | LNVAISLLQDI-DVSFSTP--WVCRA--YDALKGGNPLPMAEVLIALG--KATPGVSDDAH  |   |              |
| MHVJ   | P2 1718 | INVACLMLQHL-SLKFP----KWQWRRPGNEFRSGKPLRFVSLVLAAG--SFKFNEPSDST  |   |              |
| HKU1   | P2 1759 | VNVACLMLQHI-NLKFN----KWQWQEAWEYFRAGRPHRLVALVLAAG--HFKFDEPSDAT  |   |              |
| BCoV   | P2 1673 | VNVACLMLQSL-NLKF----IVQWQEAWLEFRSGRPARFVSLVLAAG--GFKFGDPADSR   |   |              |
| OC43   | P2 1673 | VNVACLMLQSL-NLKF----IVQWQEAWLEFRSGRPARFVSLVLAAG--GFKFGDPADSR   |   |              |
| 229E   | p2 1703 | VNAVCIALQYS-KPHFI----SQGLDAAWNKFVLDGVEIFVAVVYYVA--RLMKGDKGDA-  |   |              |
| NL63   | P2 1680 | VNATCIILQYL-KPTFK----SKGLNLVWNKFVTDVGVFPVSYFYFIT--MSSKQKQKDA-  |   |              |
| TGEV   | P2 1590 | INAICLALQRL-KPQWK----FPGVGRGLWNEFLERKTQGFVHMLYHIS--GVKKGEPGDA- |   |              |
| aIBV   | PLP1276 | ISSAIVLLQAA-KIRFK----GFLTEAWAKLLGGDPTDFVAVWCYASC--TAKVGDPSDAN  |   |              |
| 229E   | P1 1056 | VNSVMLQIQLT-GI-----LDGDYAMQFFKMGVAKMIERCYTAE--QCIRGAMGDVVG     |   |              |
| NL63   | P1 1061 | ISTTLVQLQLT-KL-----LDSDIEMQLFKVGVKVDIVQKCYELS--HLISGSLGDSG     |   |              |
| BCoV   | P1 1076 | LRSVLAVMQLK-PCQF----KDKNLQDLWVLYKQYSQLFVDTLVNKPANIVVPPQGGYVA   |   |              |
| OC43   | P1 1076 | LRSVLAVMQLK-PCQF----KDKNLQDLWVLYKQYSQLFVDTLVNKPANIVVPPQGGYVA   |   |              |
| HKU1   | P1 1143 | LRSVLLVMQLK-PKFF----KDLAIENMWLSYKVGYNQSFVDYLLTTIPKAIIVLPQGGYVA |   |              |
| MHVJ   | P1 1122 | LRSTLIVMQLK-PLFF----KDLGMQKLWLSYKAGYDQCFVDKLVKSAFKSIILPQGGYVA  |   |              |
| TGEV   | P1 1095 | INACCYQLQAF---DF-----FNNEAWEKFKKGDVMDVFNLCYAAT--TLARGHSQDA-    |   |              |

:

|        |         | E1707 (E168)       | C1729 (C190)     |
|--------|---------|--------------------|------------------|
| SARS   | PLP1707 | ETMTHLLQH---ANLES  | KRVLNVC          |
| BtSARS | PLP1705 | ETMTHLLQH---ANLES  | KRVLNVC          |
| Bt273  | PLP1703 | ETMTHLLQH---ANLES  | KRVLNVC          |
| Bt133  | PLP1693 | EAKLLHTLLAKAELTV   | SAKMVRWCTVCGIRDI |
| BtHKU9 | PLP1599 | MVLSAVLNHG--TVTA-- | RRVMQTVCEHCGV    |
| MHVJ   | P2 1772 | DF-IRVELRE--ADLSG  | ATCDLEFICK-CGVKQ |
| HKU1   | P2 1813 | DF-IRVVLKQ--ADLSG  | AICELELICK-CG    |
| BCoV   | P2 1727 | DF-LRVVFSQ--VDLTG  | AICDFEIAICK-CG   |
| OC43   | P2 1727 | DF-LRVVFSQ--VDLTG  | AICDFEIAICK-CG   |
| 229E   | p2 1756 | EDTL-TKLSKYL       | LANEAQVQL        |
| NL63   | P2 1733 | EEAL-SKLS          | EYLISDSIVTLEQ    |
| TGEV   | P2 1643 | ELML-HKLG          | DMLDNDCEIIVTHTT  |
| aIBV   | PLP1329 | WL-LANLAEHFD       | DADYTNAF         |
| 229E   | P1 1106 | LCMYRLLK----       | DLHTGF           |
| NL63   | P1 1111 | KL-LSSELLK----     | EKYTCSITFEMSC    |
| BCoV   | P1 1132 | DFAYWFLTL----      | CDWQ--CVAYW      |
| OC43   | P1 1132 | DFAYWFLTL----      | CDWQ--CVAYW      |
| HKU1   | P1 1199 | DFAYWFLNQ----      | FDIN--AYANW      |
| MHVJ   | P1 1178 | DFAYFFLSQ----      | CSPK--AYANW      |
| TGEV   | P1 1143 | EYLLEMLN----       | DYSTAKIVLAAKCG   |

|        |         | C1766 (C227) | P1788 (P249) | Y1804 (Y265) | HIS1812 (H273) | Y1813 (Y274)  |
|--------|---------|--------------|--------------|--------------|----------------|---------------|
| SARS   | PLP1762 | IPC          | VCG--RDATQYL | VQ           | QESSFV         | MMS---        |
| BtSARS | PLP1760 | IPC          | VCG--RDATQYL | VQ           | QESSFV         | MMS---        |
| Bt273  | PLP1758 | IPC          | VCG--RDATQYL | VQ           | QESSFV         | MMS---        |
| Bt133  | PLP1751 | ETC          | VCG--SVK     | KHRQLVEHST   | PWLLV-S---     | GLN--         |
| BtHKU9 | PLP1654 | -V           | CQ--RPA      | IRYVSEQK     | SPWLLMS---     | CTPQVPLD      |
| MHVJ   | P2 1826 | IAC          | T--D         | KLVHCTQ      | FNVFPL-ICS---  | NTF--         |
| HKU1   | P2 1867 | IG           | CN--G        | RIVHCTK      | LNVPFL-ICS---  | NTF--         |
| BCoV   | P2 1782 | -D           | CS--K        | KLIHCV       | RFVDPFL-ICS--- | NTF--         |
| OC43   | P2 1782 | -D           | CS--K        | KLIHCV       | RFVDPFL-ICS--- | NTF--         |
| 229E   | p2 1810 | G            | YCV-H        | GIKYYSR      | VRSVRRAI       | IVSVE--       |
| NL63   | P2 1783 | G            | F            | CP-HR        | HLRSLRVK       | LVSMKGTGV     |
| TGEV   | P2 1784 | E            | T            | CV-HG        | SVNVKVTQ       | IKGTVAITSL--- |
| aIBV   | PLP1386 | -N           | C            | P            | T              | C             |
| 229E   | P1 1152 | G            | T            | L            | C              | N             |
| NL63   | P1 1160 | G            | E            | C            | I              | C             |
| BCoV   | P1 1176 | --           | C            | K            | C              | G             |
| OC43   | P1 1176 | -I           | C            | K            | C              | G             |
| HKU1   | P1 1244 | C            | K            | C            | G              | S             |
| MHVJ   | P1 1222 | -M           | C            | K            | S              | M             |
| TGEV   | P1 1192 | --           | C            | G            | D              | C             |

|        |         | D1826 (D287)                 | T1841 (T302)      |
|--------|---------|------------------------------|-------------------|
| SARS   | PLP1817 | TAKE-TLYRIDGAHLTKMS-EYKGP--V | DVFYKETS          |
| BtSARS | PLP1816 | TAKE-TLYRIDGAHLTKMS-EYKGP--V | DVFYKETS          |
| Bt273  | PLP1814 | TAKE-TLYRIDGAHLTKMS-EYKGP--V | DVFYKETS          |
| Bt133  | PLP1809 | RVKDGLFYKYDSGSLTKTS-DMKCK--M | SVWYPKVRYTADCN    |
| BtHKU9 | PLP1709 | VNGT-LISVYDANTRRRTS-DLKLP--A | DILYGPTSFTSDSK    |
| MHVJ   | P2 1879 | KCKP-KYQLYD                  | ACNVSKVS-EAKGN--F |
| HKU1   | P2 1919 | KCGS-PYQHYD                  | ACSVKKYT-GVSGC--L |
| BCoV   | P2 1834 | KCEQ-SYQLYD                  | ASNVKVT-DVTGN--L  |
| OC43   | P2 1834 | KCEQ-SYQLYD                  | ASNVKVT-DVTGN--L  |
| 229E   | p2 1869 | YDTA-KKSMYD                  | GDRFVKHD-LSLLS--V |
| NL63   | P2 1840 | YDAA-NNAVYD                  | GARLFSSD-LSTLA--V |
| TGEV   | P2 1748 | YDNR-NGLVVDAEKAYHFN-RDLLQ--V | TAIASNFV-----     |
| aIBV   | PLP1502 | QAA---GQAF                   | DNLA              |
| 229E   | P1 1209 | NIYS-QNLCVD                  | GFGV              |
| NL63   | P1 1216 | NLYS-FNKAI                   | DGFGV             |
| BCoV   | P1 1220 | VD---GKQI                    | DDHRVTSIT---      |
| OC43   | P1 1220 | VD---GKQI                    | DDHRVTSIT---      |
| HKU1   | P1 1298 | IGDEQ---                     | IDGKFVTKFS---     |
| MHVJ   | P1 1276 | VD---GKQI                    | DGKVVTKFN---      |
| TGEV   | P1 1249 | DD-IEHG                      | YCV               |

## References:

1. Barretto N, Jukneliene D, Ratia K, Chen Z, Mesecar AD, Baker SC. The Papain-Like Protease of Severe Acute Respiratory Syndrome Coronavirus has Deubiquitinating Activity. *Journal of virology* 2005; 79.24: 15189-98.
2. Snijder EJ, Bredenbeek PJ, Dobbe JC, Thiel V, Ziebuhr J, Poon LLM, Guan Y, Rozanov M, Spaan WJM, Gorbalenya AE. Unique and conserved features of genome and proteome of SARS-coronavirus, an early split-off from the coronavirus group 2 lineage. *J Mol Biol* 2003; 331: 991-1004
3. Sulea T, Lindner HA, Purisima EO, Ménard R. Binding Site-Based Classification of Coronaviral Papain-Like Proteases. *Proteins*. 2006; 62.3: 760-75.
4. Ortega J, Escors D, Laude H & Enjuanes L. *J.Virol.* 2002; 76: 11518-11529.
5. van der Hoek L, Pyrc K, Jebbink MF, Vermeulen-Oost W, Berkhout RJ, Wolthers KC, Wertheim-van Dillen PM, Kaandorp J, Spaargaren J, Berkhout B. Identification of a new human coronavirus. *Nat Med* 2004; 10: 368-373.
6. Fouchier RA, Hartwig NG, Bestebroer TM. A previously undescribed coronavirus associated with respiratory disease in humans. *Proc Natl Acad Sci USA* 2004; 101:6212-6.
7. Thiel V, Herold J., Schelle B and Siddell SG. Infectious RNA transcribed in vitro from a cDNA copy of the human coronavirus genome cloned in vaccinia virus. *J. Gen. Virol.* 2001; 82: PT 6, 1273-1281.
8. Herold J, Siddell SG and Gorbalenya AE. A human RNA viral cysteine proteinase that depends upon a unique Zn<sup>2+</sup>-binding finger connecting the two domains of a papain-like fold. *J. Biol. Chem.* 1999; 274:21, 14918-14925.
9. *Current Opinion in Infectious Diseases.* 2007; 20.2: 204-236
10. Woo PCY, Lau SKP, Chu C, Chan K, Tsoi H, Huang Y, Wong BHL, Poon RWS, Cai JJ, Luk W, Poon LLM, Wong SSY, Guan Y, Peiris JSM, and Yuen K. Characterization and Complete Genome Sequence of a Novel Coronavirus, Coronavirus HKU1, from Patients with Pneumonia. *Journal of Virology*, January 2005; 79.2: 884-895
11. Lau SKP, Woo PCY, Yip CCY, Tse H, Tsoi H, Cheng VCC, Lee P, Tang BSF, Cheung CHY, Lee RA, So L, Lau Y, Chan K, and Yuen K. Coronavirus HKU1 and Other Coronavirus Infections in Hong Kong. *Journal of clinical microbiology* 2006; 44.6: 2063-71.
12. Lee HJ, Shieh CK, Gorbalenya AE, Koonin EV, La Monica N, Tuler J, Bagdzhadzhyan A, and Lai MM. The complete sequence (22 kilobases) of murine coronavirus gene 1 encoding the putative proteases and RNA polymerase. *Virology.* 1991; 180 (2), 567-582.
13. Schiller JJ., Kanjanahaluethai A. and Baker SC. Processing of the coronavirus MHV-JHM polymerase polyprotein: identification of precursors and proteolytic products spanning 400 kilodaltons of ORF1a. *Virology.* 1998; 242:2, 288-302.
14. Mouse Hepatitis Virus (MHV) Division of Animal Resources University of Illinois, Urbana,  
<http://www.dar.uiuc.edu/FACT%20Sheets/MHV.pdf#search=%22Mouse%20hepatitis%20virus%22>
15. Vijgen L., Keyaerts E., Moes E., Thoelen I., Wollants E., Lemey P., Vandamme AM, and Van Ranst M. Complete genomic sequence of human coronavirus OC43: molecular clock analysis suggests a relatively recent zoonotic coronavirus transmission event. *J. Virol.* 2005; 79:3, 1595-1604.
16. Harcourt BH, Jukneliene D, Kanjanahaluethai A, Bechill J, Severson KM, Smith CM, Rota PA, Baker SC. Identification of Severe Acute Respiratory Syndrome Coronavirus

- Replicase Products and Characterization of Papain-Like Protease Activity. *Journal of virology* 2004, 78.24: 1360-12.
17. Tang XC., Zhang JX., Zhang SY., Wang P., Fan XH., Li LF., Li G., Dong BQ., Liu W., Cheung CL., Xu KM., Song WJ., Vijaykrishna D., Poon LLM., Peiris JSM., Smith GJD., Chen H., Guan Y. Prevalence and genetic diversity of coronaviruses in bats from China. *J. Virol.* 2006; 80:15, 7481-7490.
  18. Woo PC, Wang M, Lau SK, Xu H, Poon RW, Guo R, Wong BH, Gao K, Tsoi HW, Huang Y, Li KS, Lam CS, Chan KH, Zheng BJ and Yuen KY. Comparative analysis of twelve genomes of three novel group 2c and group 2d coronaviruses reveals unique group and subgroup features. *J. Virol.* 2007; 81:4, 1574-1585.
  19. Thompson JD, Gibson TJ, Plewniak F, Jeanmougin F, Higgins DG. The CLUSTAL\_X windows interface: flexible strategies for multiple sequence alignment aided by quality analysis tools. *Nucleic Acids Res.* 1997; 25.24: 4876-82.
  20. Lau SK, Woo PC, Li KS, Huang Y, Tsoi HW, Wong BH, Wong SS, Leung SY, Chan KH, Yuen KY. Severe acute respiratory syndrome coronavirus-like virus in Chinese horseshoe bats. *Proc Natl Acad Sci U S A.* 2005; 102(39):14040-5. Epub 2005 Sep 16.
  21. Ratia K, Saikatendu KS, Santarsiero BD, Barretto Naina, Baker SC, Stevens RC, Mesecar AD, Severe Acute Respiratory Syndrome Coronavirus Papain-Like Protease: Structure of a Viral Deubiquitinating Enzyme. *Proceedings of the National Academy of Sciences of the United States of America* 2006; 103.15: 5717-22.
  22. Li W, Shi Z, Yu M, Ren W, Smith C, Epstein JH, Wang H, Crameri G, Hu Z, Zhang H, Zhang J, McEachern J, Field H, Daszak P, Eaton BT, Zhang S and Wang LF. Bats are natural reservoirs of SARS-like coronaviruses. *Science.* 2005; 310 (5748), 676-679.
  23. Vijaykrishna D, Smith GJ, Zhang JX, Peiris JS, Chen H, Guan Y. Evolutionary insights into the ecology of coronaviruses. *J Virol.* 2007; 81(8):4012-20. Epub 2007 Jan 31.
  24. Liu DX, Tibbles KW, Cavanagh D, Brown TD, and Brierley I. Identification, expression, and processing of an 87-kDa polypeptide encoded by ORF 1a of the coronavirus infectious bronchitis virus. *Virology.* 1995; 208 (1), 48-57.
